# Supplementary material
Source: publisher figshare collection journal article supplement (https://frontiersin.figshare.com/ndownloader/files/26730716)
Supplement: Supplementary file 1 [file 26730716]

Supplementary Material

1. **Supplementary Figures**

**Supplementary Figure 1** NRM intensity, magnetic susceptibility, S-ratio maps of GSL19 microbialite samples with cubic interpolation to produce contours. (A) NRM intensity map (B) magnetic susceptibility (C) S-ratio map of GSL19_0103A with approximate 1.5 cm spatial resolution. (D) NRM intensity map (E) magnetic susceptibility (F) S-ratio map of GSL19_0202A with approximate 1.5 cm spatial resolution. Color contours are on a linear scale but labeled black contour lines show order of magnitude variations. Black dots are sample positions and the color bars represent NRM intensity (Am2/kg), magnetic susceptibility(m3/kg), and S-ratio in the color range. Solid (up) red arrow indicates up in the field and is similar to the sample’s growth direction. The white dashed lines roughly represent the locations of distinct laminations.

**Supplementary Figure 2.** Magnetization (M, y-axis) as a function of applied field (x-axis) of GSL18 (A), LB19 (B), and BG14 (C) microbialites. While GSL18_0101_00 (A) and LB19_0302_D (B) specimens have negative slopes (diamagnetic), BG14_0101_A22 (C) specimens have positive slopes (paramagnetic). (Figure generated using FORCinel; Harrison and Feinberg, 2008, *Geochem. Geophys., Geosys*., 9, doi:10.1029/2008GC001987).

**Supplementary Figure 3.** S-ratio map of GSL19_0201A with cubic interpolation to produce contours with approximate 1.5 cm spatial resolution. Color contours are on a linear scale. Black dots are sample positions and the color bars S-ratio in color range. Solid (up) red arrow indicates up in the field and is similar to the sample’s growth direction. The white dashed lines roughly represent the locations of distinct laminations.

**
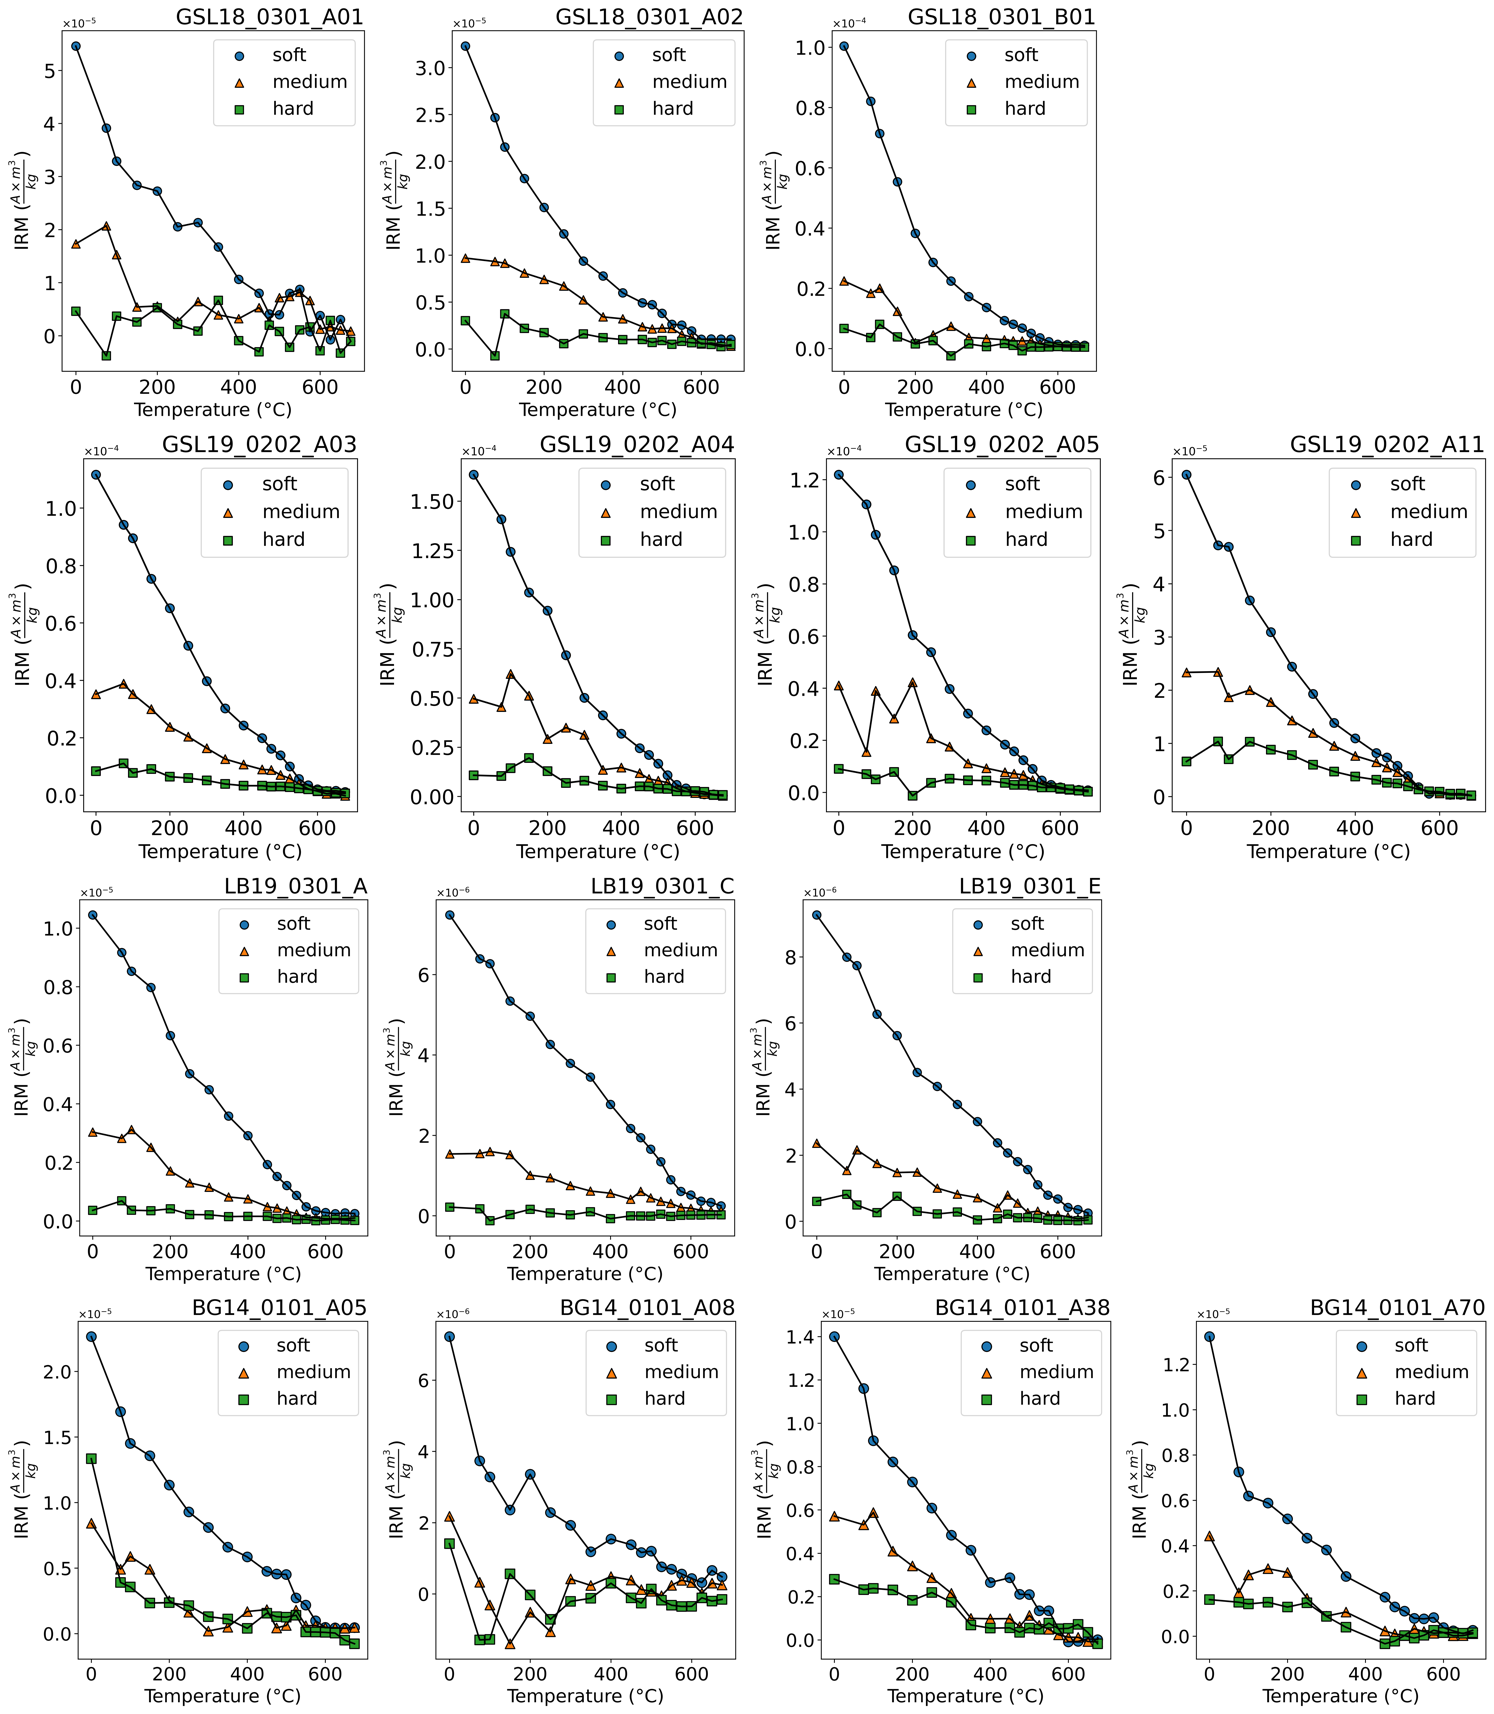
**

**Supplementary Figure 4.** Three-component IRM technique thermal demagnetization results for GSL18_0301 (1st row), GSL19_0202 (2nd row), LB19_0301 (3rd row), and BG14_0101 (4th row) specimens. Three-component IRM (Am2/kg) produced with applied field of 100 mT (soft), 300 mT (intermediate), and 1000 mT (hard). Soft, medium, and hard fractions are shown as blue circle, orange triangle, and green square, respectively.

**Supplementary Figure 5.** Susceptibility as a function of temperature for Bayan Gol specimens (A08, A40, A34, and A70). Measurements were conducted under flowing Ar on an AGICO MFK1-FA Multifunction Kappabridge susceptibility bridge. Data collected with an empty furnace were linearly interpolated and subtracted from the raw susceptibility data. Heating and cooling curves are colored in red and blue, respectively.

1. **Supplementary Tables**

**Supplementary Table 1.** IRM unmixing statistics of GSL18, GSL19_0202, LB19, and BG14_0101 specimens.

GSL18

| **component 1** | **MC** | **MC. σ** | **DP** | **DP. σ** | **P** | **P. σ** | **S** | **S. σ** |
| --- | --- | --- | --- | --- | --- | --- | --- | --- |
| **GSL18_0101_00** | 57.146 | 1.002 | 2.815 | 1.003 | 0.949 | 0.002 | 1.237 | 0.005 |
| **GSL18_0101_01** | 54.719 | 1.003 | 2.630 | 1.004 | 0.941 | 0.002 | 1.169 | 0.004 |
| **GSL18_0301_A01** | 57.023 | 1.002 | 2.601 | 1.002 | 0.988 | 0.002 | 1.030 | 0.004 |
| **GSL18_0301_A02** | 54.043 | 1.002 | 2.610 | 1.002 | 0.964 | 0.002 | 1.103 | 0.003 |
| **GSL18_0301_A01*** | 38.376 | 1.006 | 2.722 | 1.004 | 0.951 | 0.003 | 0.963 | 0.007 |
| **GSL18_0301_A02*** | 38.518 | 1.012 | 3.000 | 1.008 | 0.948 | 0.003 | 0.983 | 0.012 |
| **GSL18_0301_B01*** | 39.453 | 1.005 | 2.651 | 1.003 | 0.957 | 0.003 | 1.024 | 0.007 |
| **GSL18_0301_B03*** | 36.990 | 1.012 | 2.756 | 1.008 | 0.962 | 0.004 | 1.010 | 0.014 |
|  |  |  |  |  |  |  |  |  |

GSL19

| **component 1** | **MC** | **MC. σ** | **DP** | **DP. σ** | **P** | **P. σ** | **S** | **S. σ** |
| --- | --- | --- | --- | --- | --- | --- | --- | --- |
| **GSL19_0202_A03*** | 36.759 | 1.015 | 2.952 | 1.011 | 0.960 | 0.004 | 0.925 | 0.014 |
| **GSL19_0202_A04*** | 34.132 | 1.012 | 2.902 | 1.009 | 0.964 | 0.003 | 0.896 | 0.011 |
| **GSL19_0202_A05*** | 36.637 | 1.015 | 2.909 | 1.011 | 0.979 | 0.004 | 0.873 | 0.013 |
| **GSL19_0202_A10*** | 38.899 | 1.016 | 3.289 | 1.011 | 0.971 | 0.003 | 0.939 | 0.013 |
| **GSL19_0202_A11*** | 41.287 | 1.014 | 3.193 | 1.010 | 0.955 | 0.004 | 0.968 | 0.013 |
| **GSL19_0202_A12*** | 40.088 | 1.016 | 3.139 | 1.011 | 0.995 | 0.003 | 0.859 | 0.013 |

LB19

| **component 1** | **MC** | **MC. σ** | **DP** | **DP. σ** | **P** | **P. σ** | **S** | **S. σ** |
| --- | --- | --- | --- | --- | --- | --- | --- | --- |
| **LB19_0102_03** | 50.199 | 1.006 | 2.371 | 1.006 | 0.980 | 0.003 | 1.084 | 0.012 |
| **LB19_0301_A** | 49.806 | 1.002 | 2.314 | 1.002 | 1.004 | 0.001 | 0.969 | 0.004 |
| **LB19_0301_B** | 27.885 | 1.005 | 2.907 | 1.004 | 0.969 | 0.003 | 0.761 | 0.005 |
| **LB19_0301_A*** | 30.502 | 1.013 | 2.798 | 1.010 | 0.967 | 0.003 | 0.804 | 0.010 |
| **LB19_0301_B*** | 29.665 | 1.016 | 2.779 | 1.012 | 0.968 | 0.004 | 0.798 | 0.012 |
| **LB19_0301_C*** | 28.952 | 1.013 | 2.560 | 1.010 | 0.967 | 0.004 | 0.837 | 0.011 |
| **LB19_0301_D*** | 28.953 | 1.012 | 2.622 | 1.009 | 0.955 | 0.004 | 0.849 | 0.010 |
| **LB19_0301_E*** | 30.902 | 1.010 | 2.508 | 1.007 | 0.972 | 0.004 | 0.908 | 0.012 |
| **LB19_0304_02** | 49.891 | 1.005 | 2.360 | 1.005 | 0.976 | 0.002 | 1.020 | 0.009 |
| **LB19_0304_05** | 30.355 | 1.003 | 2.240 | 1.002 | 0.993 | 0.002 | 0.974 | 0.007 |

BG14

| **component 1** | **MC** | **MC. σ** | **DP** | **DP. σ** | **P** | **P. σ** | **S** | **S. σ** |
| --- | --- | --- | --- | --- | --- | --- | --- | --- |
| **BG14_0101A_05*** | 30.711 | 1.046 | 2.398 | 1.051 | 0.773 | 0.064 | 0.697 | 0.026 |
| **BG14_0101A_08** | 46.138 | 1.023 | 2.218 | 1.021 | 0.942 | 0.029 | 0.986 | 0.023 |
| **BG14_0101A_12*** | 42.830 | 1.031 | 2.213 | 1.033 | 0.759 | 0.025 | 1.003 | 0.046 |
| **BG14_0101A_38*** | 39.355 | 1.043 | 2.382 | 1.020 | 0.966 | 0.031 | 0.857 | 0.029 |
| **BG14_0101A_70** | 46.127 | 1.026 | 2.352 | 1.018 | 0.980 | 0.013 | 0.954 | 0.028 |
|  |  |  |  |  |  |  |  |  |
| **component 2** | **MC** | **MC. σ** | **DP** | **DP. σ** | **P** | **P. σ** | **S** | **S. σ** |
| **BG14_0101A_05*** | 462.963 | 1.275 | 4.791 | 1.365 | 0.656 | 0.012 | 0.817 | 0.133 |
| **BG14_0101A_08** | 1433.329 | 1.528 | 7.073 | 1.607 | 0.186 | 0.010 | 1.148 | 0.301 |
| **BG14_0101A_12*** | 557.620 | 2.798 | 14.897 | 1.597 | 0.422 | 0.014 | 0.196 | 0.227 |
| **BG14_0101A_38*** | 706.804 | 1.570 | 4.032 | 1.420 | 0.244 | 0.013 | 1.629 | 0.351 |
| **BG14_0101A_70** | 527.266 | 1.278 | 3.030 | 1.273 | 0.112 | 0.017 | 1.536 | 0.267 |

MC: Mean Coercivity (mT); MC. σ: Mean coercivity standard deviation (mT); DP: dispersion (mT); DP. σ: dispersion standard deviation (mT); P: relative proportion; P. σ: relative proportion standard deviation; S: skewness; S. σ: standard deviation of skewness. Note that ‘*’ means specimens subjected to -1000mT before the stepwise IRM acquisition.
